# Supplementary figures and images for: Increased serum free IgE levels in patients with chronic spontaneous urticaria (CSU)
Source: PubMed Central journal article supplement — World Allergy Organ J. 2022 Feb 12;15(2):100629. doi: 10.1016/j.waojou.2022.100629 (PMC8883342; doi:10.1016/j.waojou.2022.100629), 2022-02-12

**A**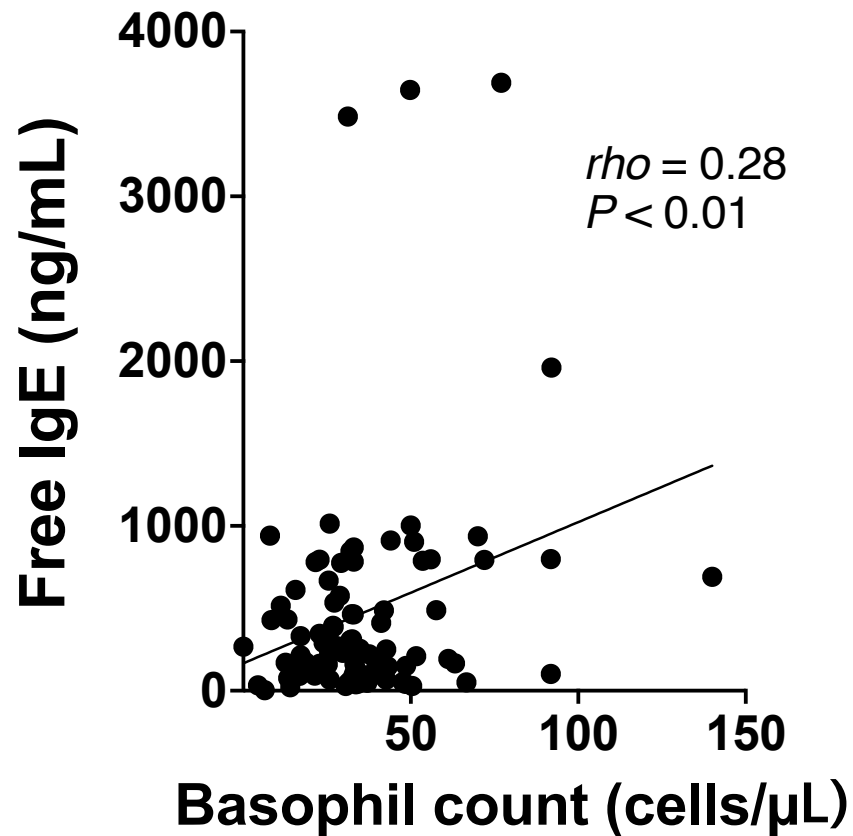**B**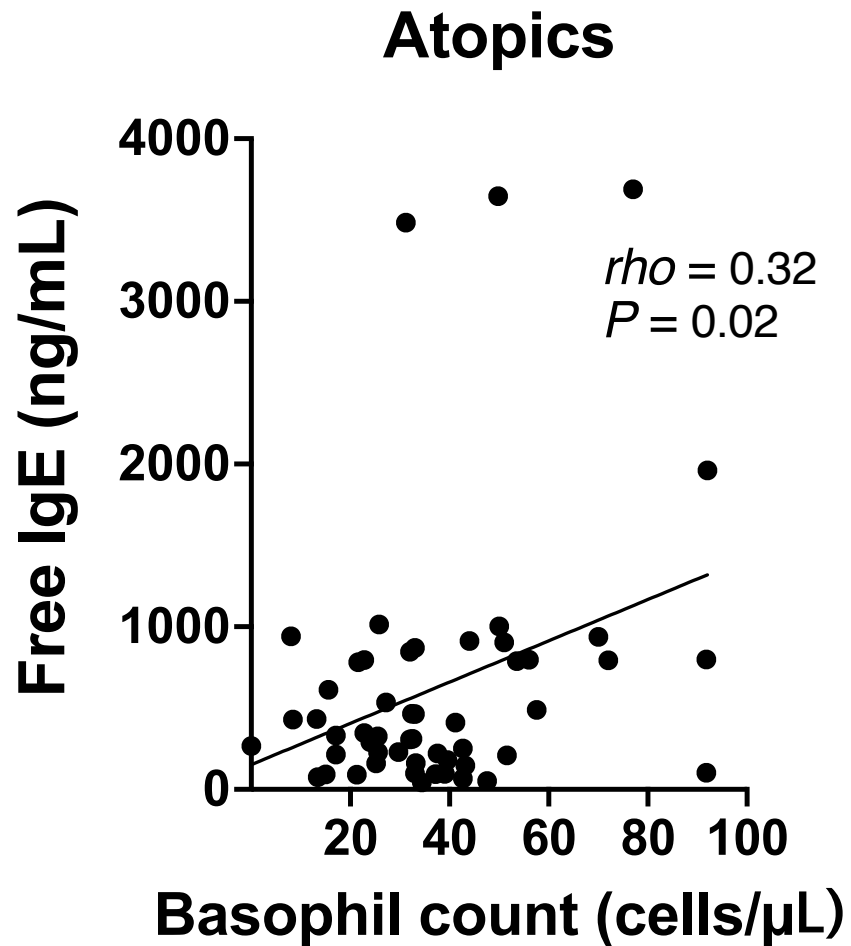

Supplement: mmc2.pdf [file mmc2.pdf]

**A**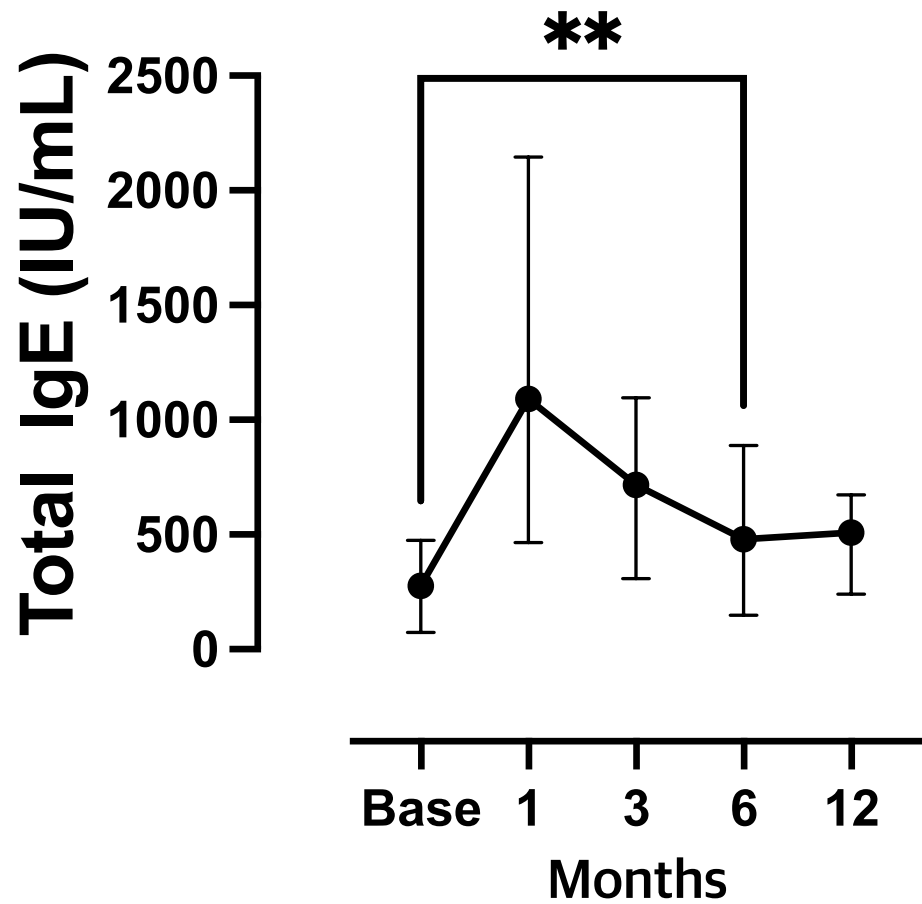**B**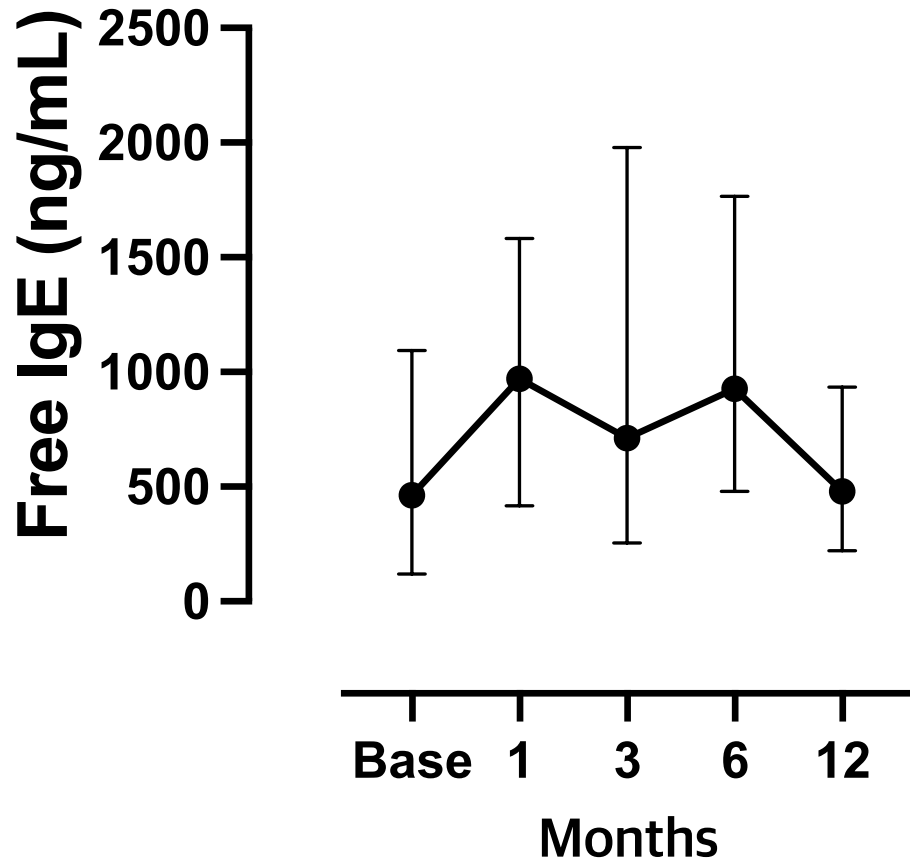

Supplement: mmc3.pdf [file mmc3.pdf]

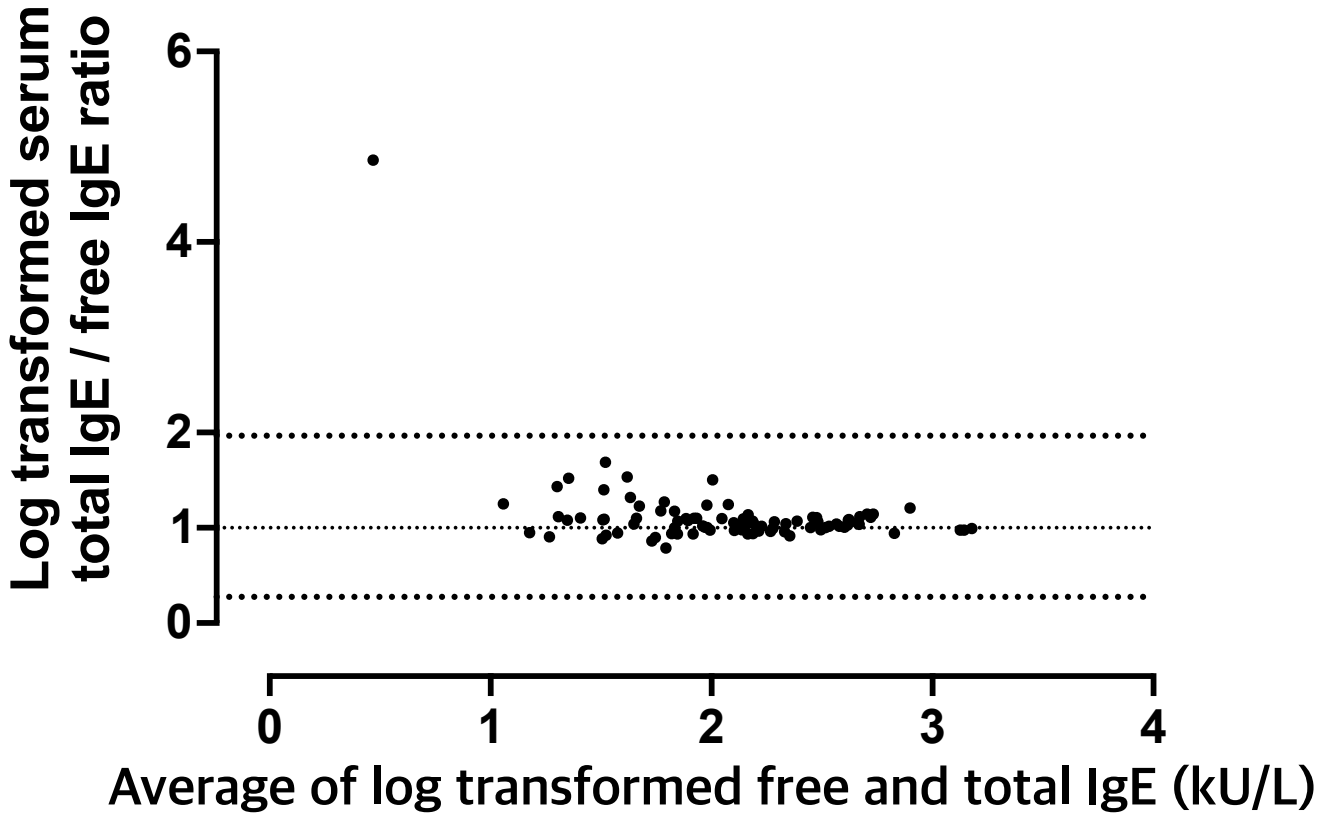

Supplement: mmc4.pdf [file mmc4.pdf]
